# Supplementary material
Source: MDPI journal article supplement (https://www.mdpi.com/2073-4344/10/11/1351)
Supplement: s1 [file s1]

Article

# Physical and Chemical Synthesis of Au/CeO<sub>2</sub> Nanoparticle Catalysts for Room Temperature CO Oxidation: A Comparative Study

Khaled Mohammad Saoud <sup>1,\*</sup> and Mohamed Samy El-Shall <sup>2</sup>

<sup>1</sup> Liberal Arts and Sciences Program, Virginia Commonwealth University in Qatar, Doha, Qatar; s2kmsaou@vcu.edu.

<sup>2</sup> Department of Chemistry, Virginia Commonwealth University. Richmond, VA 23284-2006, USA; mselshal@vcu.edu.

\* **Correspondence:** Khaled M. Saoud; s2kmsaou@vcu.edu, Tel.: +974 66037810

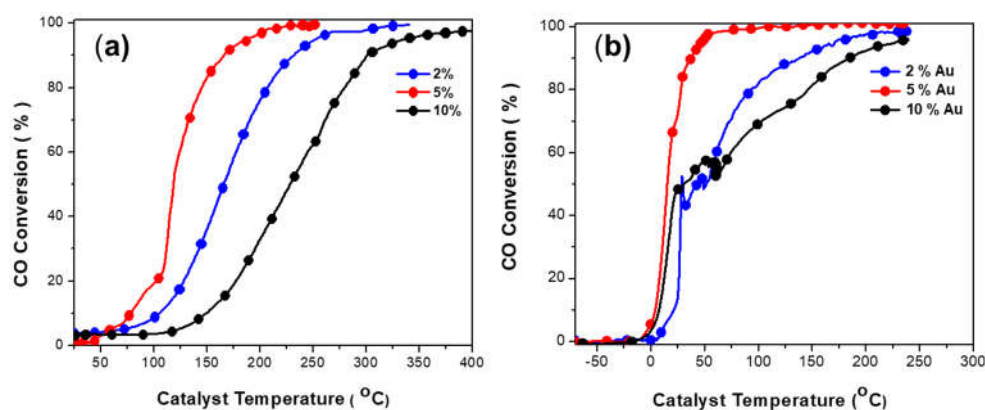

**Figure S1.** Catalytic activities of fresh Au/CeO<sub>2</sub> catalyst prepared by (a) LVCC and (b) DP methods as a function of Au loading.

**Table S1.** Concentration <sup>†</sup> of Elements Detected (in Atom%).

| Sample                     | Ce   | O     | C    | Au  |
|----------------------------|------|-------|------|-----|
| Au/CeO <sub>2</sub> (LVCC) | 28.2 | 45.54 | 26.0 | 0.3 |
| Au/CeO <sub>2</sub> (DP)   | 31.6 | 47.2  | 20.0 | 1.1 |

<sup>†</sup> Concentrations are normalized to 100%. Note: XPS does not detect hydrogen or helium. “nd” indicates none detected above XPS detection limit of ~0.1 atom%. \* Carbon concentrations were overestimated due to the overlap of Ce 4s with carbon 1s.

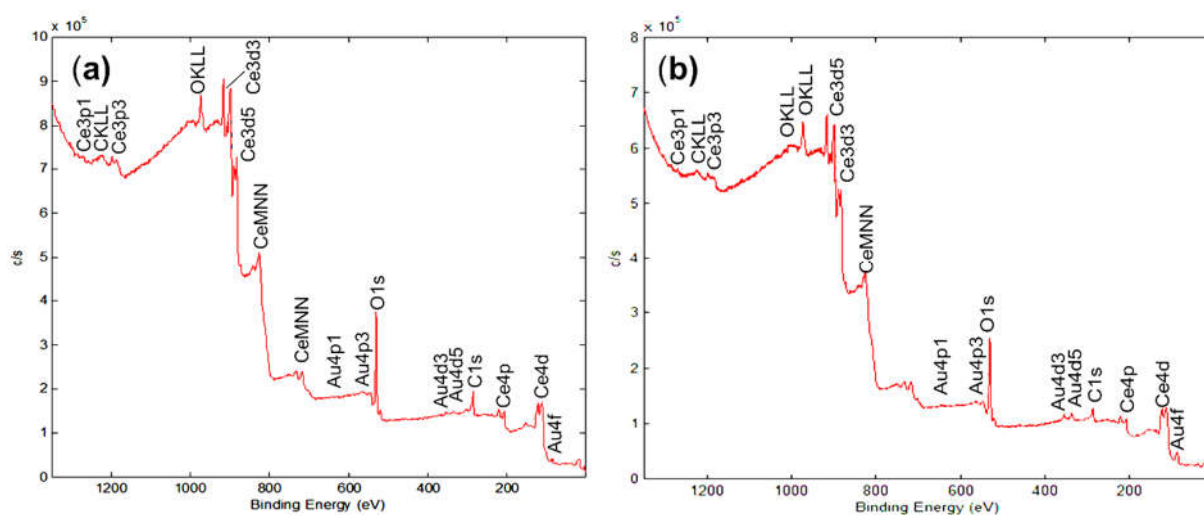

**Figure S2.** Survey scan of (a) 5% Au/CeO<sub>2</sub> (LVCC). Various amounts of the following species: cerium as Ce<sup>4+</sup>, oxygen, carbon as {C-(C, H), C-O, C=O, O-C=O}, and traces of gold as Au. (b) 5% Au/CeO<sub>2</sub> (DP). Various amounts of the following species: cerium as Ce<sup>4+</sup>, oxygen, carbon as {C-(C, H), C-O, C=O, O-C=O}, and traces of gold as Au.
